# Supplementary material
Source: PubMed Central journal article supplement (PMC3237403)
Supplement: NIHMS320427-supplement-1_si_001.pdf [file NIHMS320427-supplement-1_si_001.pdf]

**Enantioselective Conjugate Allylation of Cyclic Enones**  
Douglass F. Taber\*, David A. Gerstenhaber and James F. Berry  
*Department of Chemistry and Biochemistry, University of Delaware, Newark, DE 19716*

**Supporting Information**

**<sup>1</sup>H and <sup>13</sup>C NMR Spectra**

|    |      |
|----|------|
| 3a | S-2  |
| 3b | S-3  |
| 3c | S-4  |
| 3d | S-5  |
| 3e | S-6  |
| 4a | S-7  |
| 4b | S-8  |
| 4c | S-9  |
| 4d | S-10 |
| 4e | S-11 |
| 4f | S-12 |

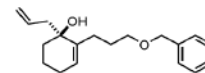

3a

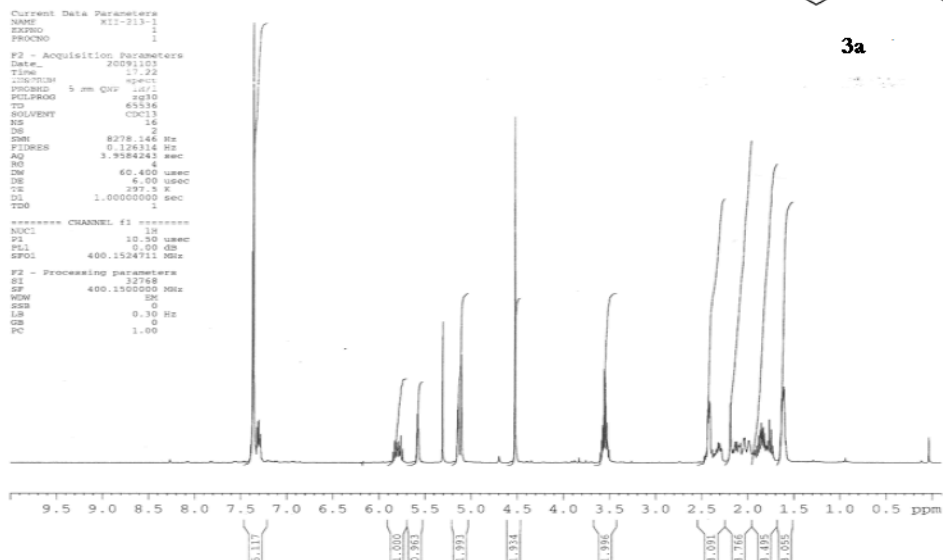

XIII-111-1  
 C13APT64 CDCl3 /opt/topspin2.1.6 dager 49

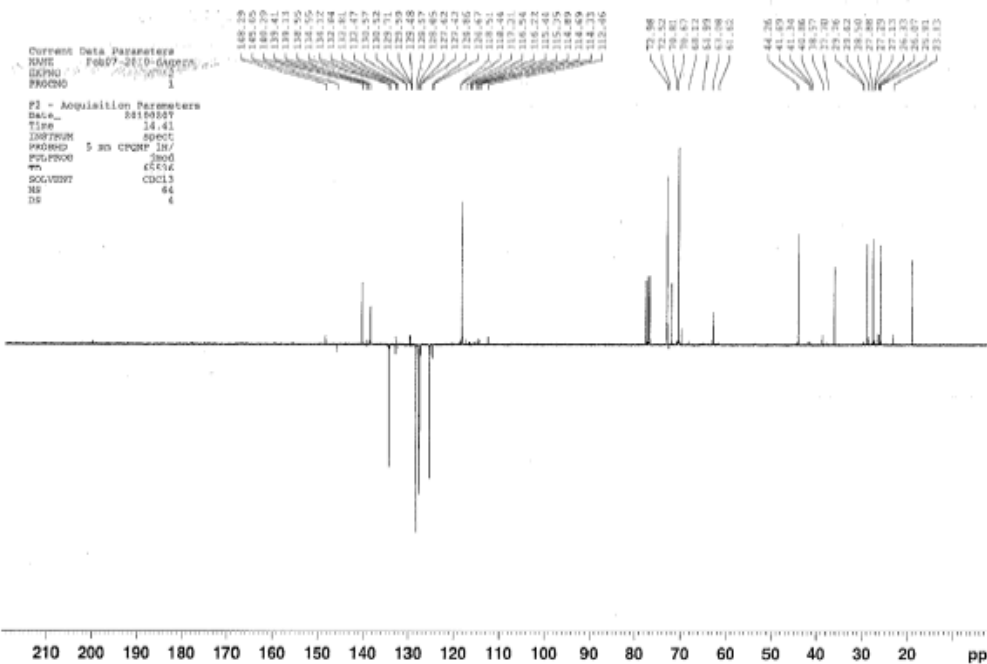

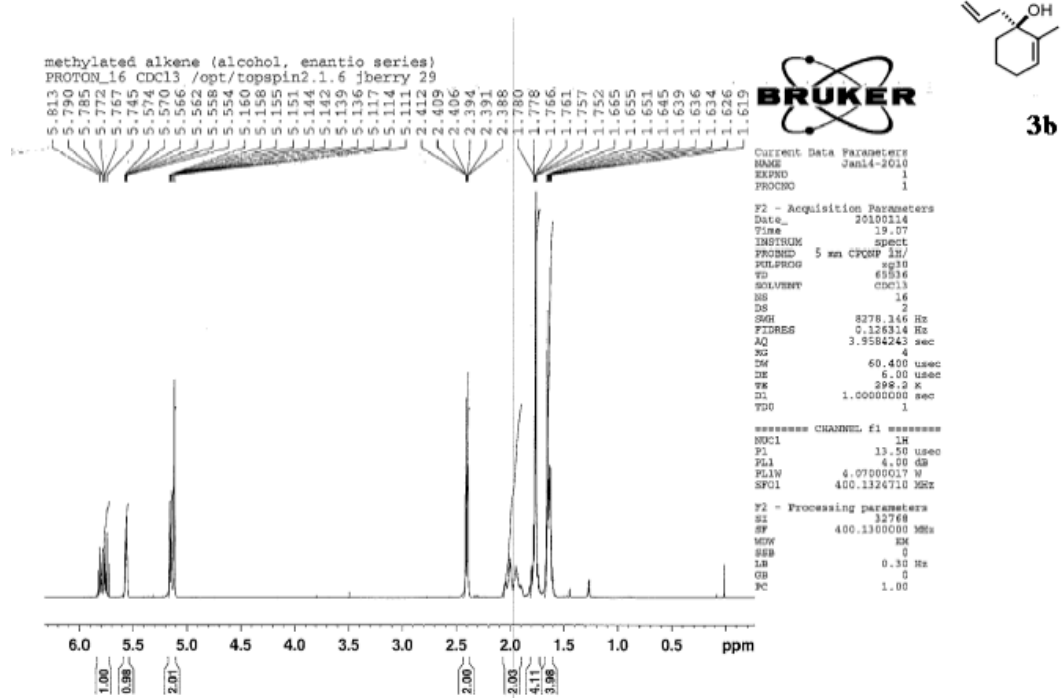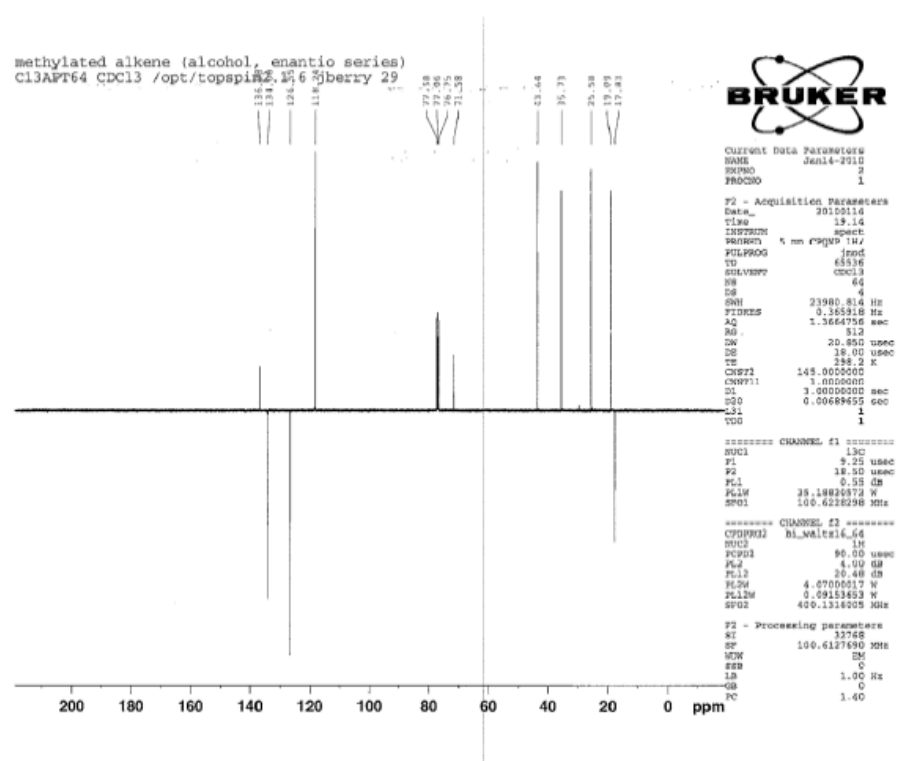

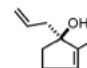

**3c**

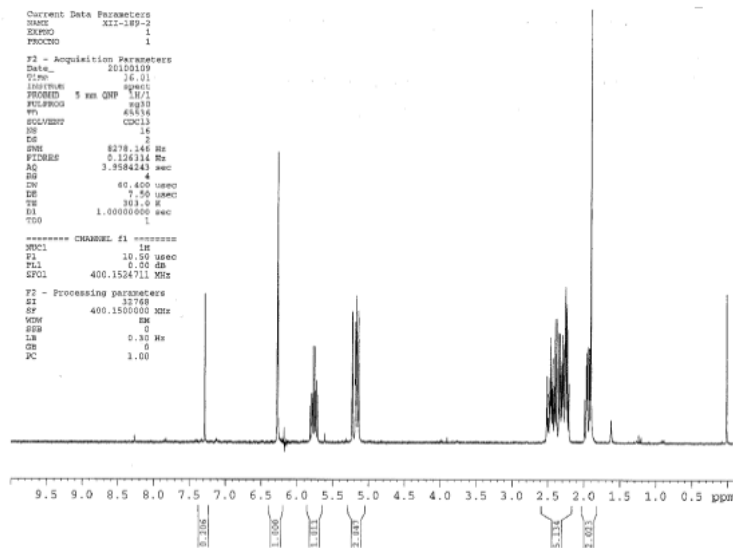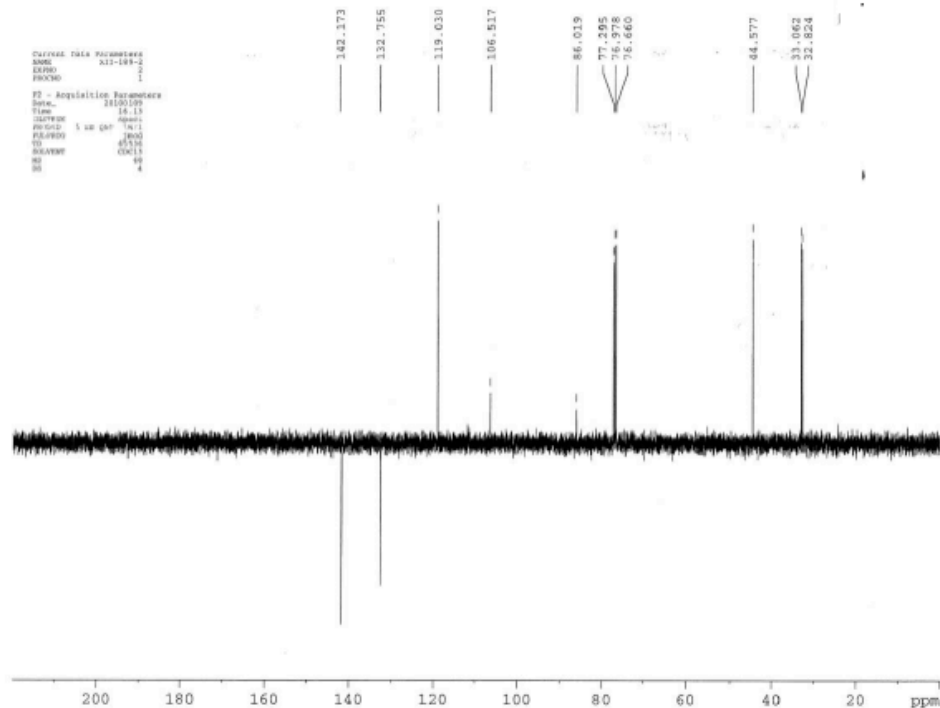

iodo alcohol  
 PROTON\_16 CDCl3 /opt/topspin2.1.6 jberry 20

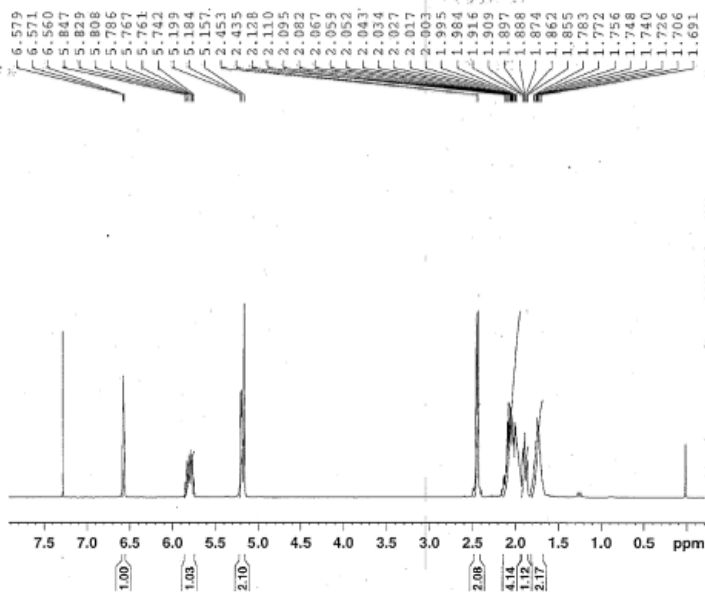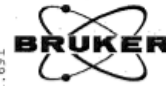

Current Data Parameters  
 NAME Jan26-2010  
 EXPNO 1  
 PROCNO 1

F2 - Acquisition Parameters  
 Date\_ 20100126  
 Time 15.08  
 INSTRUM spect  
 PROBHD 5 mm CPQNP 1H/  
 PULPROG zg30  
 TD 65536  
 SOLVENT CDCl3  
 NS 16  
 DS 2  
 SFO1 8278.166 Hz  
 FIDRES 0.130310 Hz  
 AQ 3.9584743 sec  
 RG 4  
 SW 60.400 usec  
 DE 6.00 usec  
 VE 298.2 K  
 D1 1.0000000 sec  
 D10

----- CHANNEL f1 -----  
 NUCL1 1H  
 P1 13.50 usec  
 PL1 4.00 dB  
 PL1W 4.0700017 W  
 SFO1 400.1324710 MHz

F2 - Processing parameters  
 SI 32768  
 SF 400.1300000 MHz  
 WD 4  
 SSB 0  
 LB 0.30 Hz  
 GB 0  
 PC 1.00

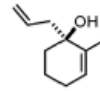

3d

iodo alcohol  
 C13APT64 CDCl3 /opt/topspin2.1.6 jberry 20

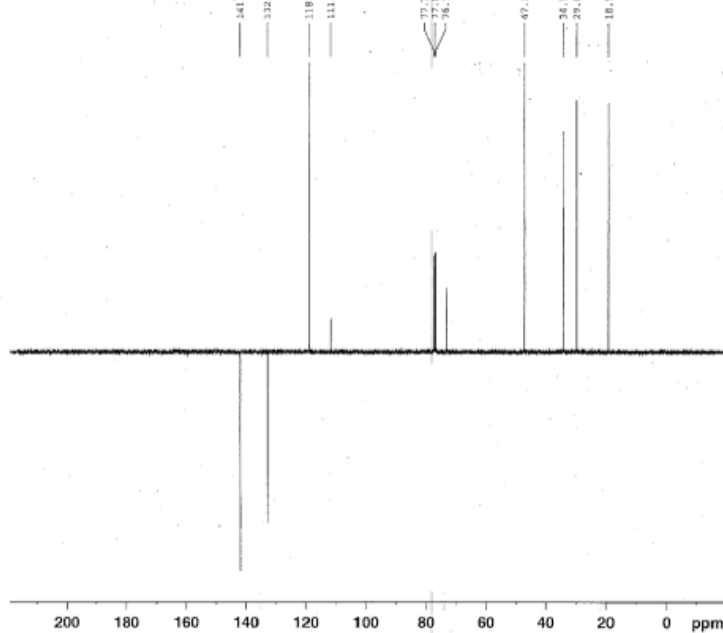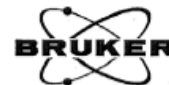

Current Data Parameters  
 NAME Jan26-2010  
 EXPNO 2  
 PROCNO 1

F2 - Acquisition Parameters  
 Date\_ 20100126  
 Time 15.15  
 INSTRUM spect  
 PROBHD 5 mm CPQNP 1H/  
 PULPROG zgpg30  
 TD 65536  
 SOLVENT CDCl3  
 NS 64  
 DS 4  
 SFO1 23980.814 Hz  
 FIDRES 0.365918 Hz  
 AQ 1.3644756 sec  
 RG 512  
 SW 20.860 usec  
 DE 18.00 usec  
 VE 298.1 K  
 CWFT1 145.000000  
 CWFT1 1.0000000  
 D1 3.0000000 sec  
 SFO 0.0000000 sec  
 L31 1  
 TDO 1

----- CHANNEL f1 -----  
 NUCL1 13C  
 P1 9.20 usec  
 PL1 18.30 dB  
 PL1W 0.18 dB  
 PL1W 35.18820572 W  
 SFO1 100.6228298 MHz

----- CHANNEL f2 -----  
 CPDPRG2 hi\_waltz16\_64  
 NUCL2 1H  
 P2P2 90.00 usec  
 PL2 4.00 dB  
 PL2 20.48 dB  
 PL2W 4.0700017 W  
 PL1W 0.09132653 W  
 SFO2 400.1316005 MHz

F2 - Processing parameters  
 SI 32768  
 SF 100.6127699 MHz  
 WD 9  
 SSB 0  
 LB 1.00 Hz  
 GB 0  
 PC 1.40

```

Current Data Parameters
NAME      XIII-033-3 dist
EXPNO    1
PROCNO   1

F2 - Acquisition Parameters
Date_    20091204
Time     17.10
INSTRUM  spect
PROBHD   5 mm QNP 1H/1
PULPROG  zg30
TD       65536
SOLVENT  CDCl3
NS       16
DS       2
SWH      8278.146 Hz
FIDRES   0.126314 Hz
AQ       3.9584243 s
RG       4
Dw       40.400 usec
DE       0.00 usec
TE       302.2 K
D1       1.0000000 sec
TDO      1

```

```

===== CHANNEL f1 =====
NUCL1    1H
P1       10.00 usec
PL1      0.00 dB
SFO1     400.1524711 MHz

```

```

F2 - Processing parameters
SI       32768
SF       400.1500000 MHz
WDW      EM
SSB      0
LB       0.10 Hz
GB       0
PC       1.00

```

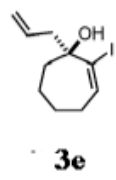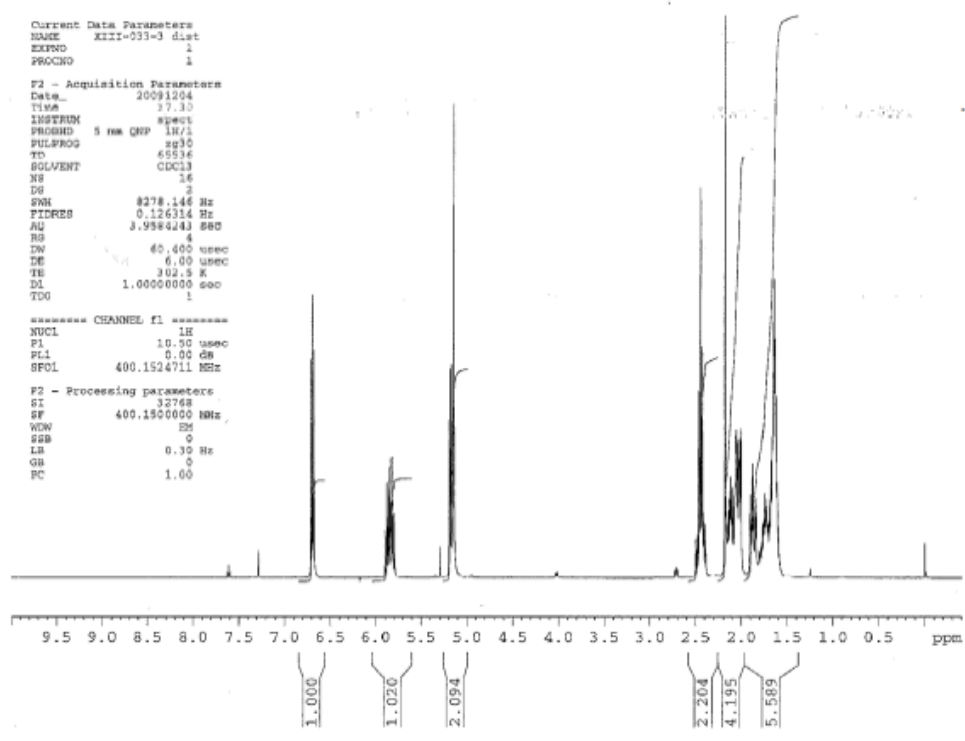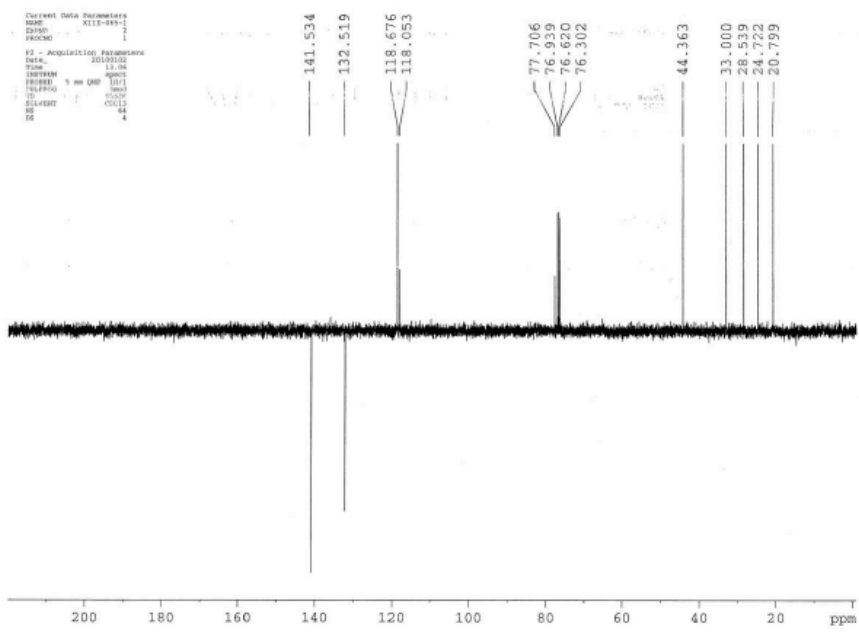

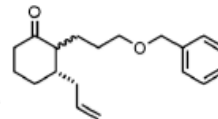

4a

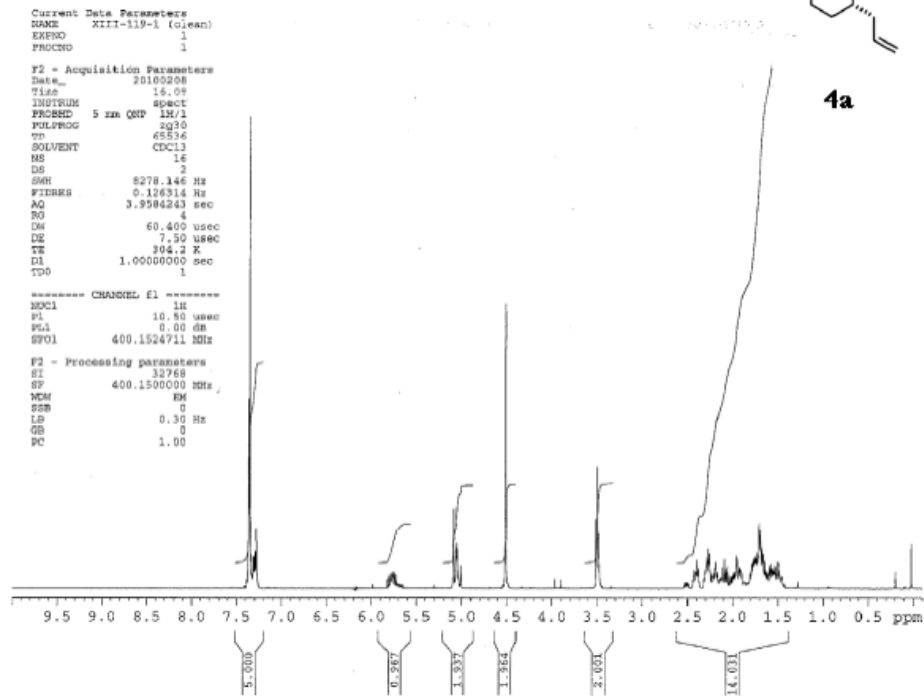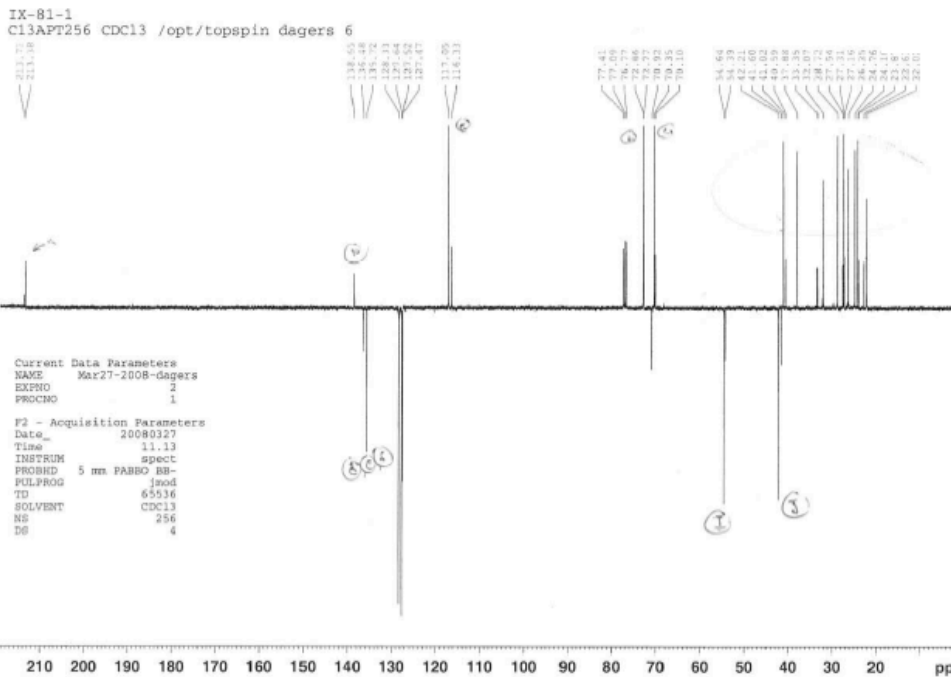

ketone  
 PROTON\_16 CDC13 /opt/topspin2.1.6 jberry 35

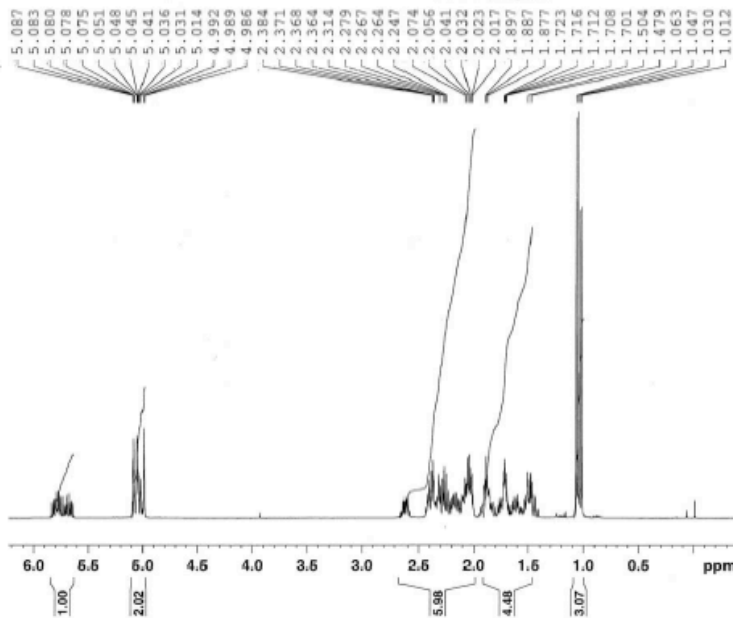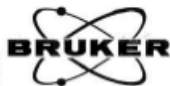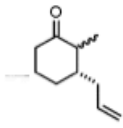

4b

Current Data Parameters  
 NAME Feb09-2010  
 EXPNO 1  
 PROCNO 1

F2 - Acquisition Parameters  
 Date\_ 20100209  
 Time 19.34  
 INSTRUM spect  
 PROBHD 5 mm CPQNP 1H/  
 PULPROG zg30  
 TD 65536  
 SOLVENT CDC13  
 NS 16  
 DS 2  
 SMI 8278.146 Hz  
 FIDRES 0.126314 Hz  
 AQ 3.9584243 sec  
 RG 4  
 DM 60.400 usec  
 DE 6.00 usec  
 TE 298.1 K  
 D1 1.00000000 sec  
 TD0 1

\*\*\*\*\* CHANNEL f1 \*\*\*\*\*  
 NUC1 1H  
 P1 13.50 usec  
 PL1 4.00 dB  
 PL1W 4.0700017 W  
 SFO1 400.1324710 MHz

F2 - Processing parameters  
 SI 32768  
 SF 400.1300000 MHz  
 NMR EM  
 SSB 0  
 LB 0.30 Hz  
 GB 0  
 PC 1.00

ketone  
 C13-APT64 CDC13 /opt/topspin2.1.6 jberry 35

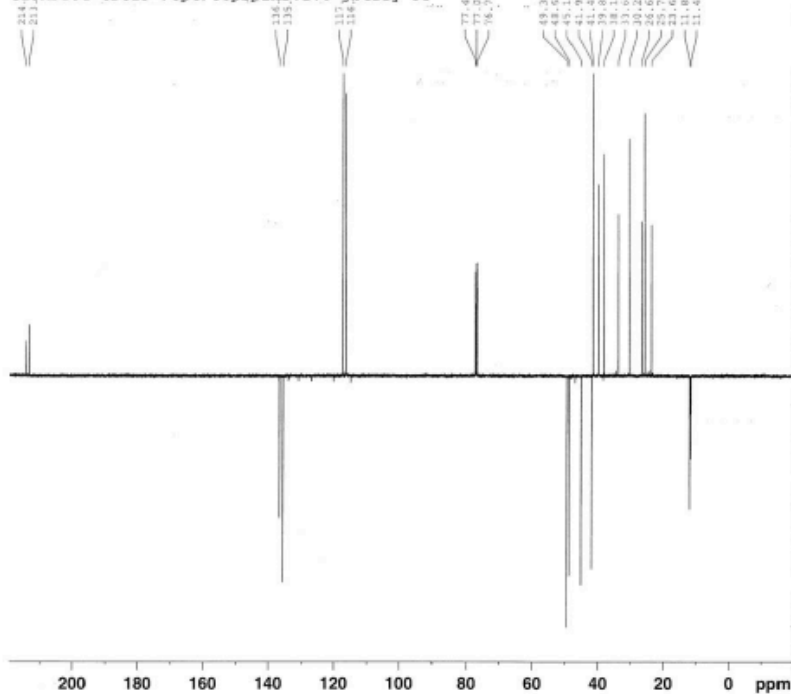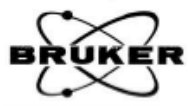

Current Data Parameters  
 NAME Feb09-2010  
 EXPNO 2  
 PROCNO 1

F2 - Acquisition Parameters  
 Date\_ 20100209  
 Time 19.41  
 INSTRUM spect  
 PROBHD 5 mm CPQNP 1H/  
 PULPROG zgpg30  
 TD 65536  
 SOLVENT CDC13  
 NS 64  
 DS 4  
 SMI 23980.814 Hz  
 FIDRES 0.145918 Hz  
 AQ 1.3664755 sec  
 RG 512  
 DM 20.850 usec  
 DE 18.00 usec  
 TE 298.1 K  
 CRF12 145.0000000  
 CHFT1 1.0000000  
 D1 1.00000000 sec  
 D20 0.00689453 sec  
 L31 1  
 TD0 1

\*\*\*\*\* CHANNEL f1 \*\*\*\*\*  
 NUC1 13C  
 P1 9.25 usec  
 P2 18.50 usec  
 PL1 0.55 dB  
 PL1W 35.18620572 W  
 SFO1 100.6228298 MHz

\*\*\*\*\* CHANNEL f2 \*\*\*\*\*  
 CPDPRG2 bi\_waltz16.64  
 NUC2 1H  
 P2D2 90.00 usec  
 PL2 4.00 dB  
 PL12 20.48 dB  
 PL2W 4.0700017 W  
 PL12W 0.09153453 W  
 SFO2 400.1316005 MHz

F2 - Processing parameters  
 SI 32768  
 SF 100.6127690 MHz  
 NMR EM  
 SSB 0  
 LB 1.00 Hz  
 GB 0  
 PC 1.40



IX-277-1  
 PROTON\_16 CDC13 /opt/topspin dagers 10

Current Data Parameters  
 NAME Jun22-2008-dagers  
 EXPR0 1  
 PROCNO 1

F2 - Acquisition Parameters  
 Date\_ 20080622  
 Time 13:20  
 INSTRUM spect  
 PROBRD 5 mm PABBO BB-  
 PULPROG zg30  
 TD 65536  
 SOLVENT cdcl3  
 NS 16  
 DS 2  
 SWH 8278.146 Hz  
 FIDRES 0.126314 Hz  
 AQ 3.9584243 sec  
 RG 128  
 DM 60.400 usec  
 DE 6.00 usec  
 TE 297.2 K  
 D1 1.00000000 sec  
 TDO 1

\*\*\*\*\* CHANNEL f1 \*\*\*\*\*  
 NUC1 1H  
 P1 11.00 usec  
 PL1 -2.00 dB  
 PL1W 18.19349861 M  
 SFO1 400.1324710 MHz

F2 - Processing parameters  
 SI 32768  
 SF 400.1300094 MHz  
 WSM RM  
 SSB 0  
 LB 0.30 Hz  
 GB 0  
 FC 1.00

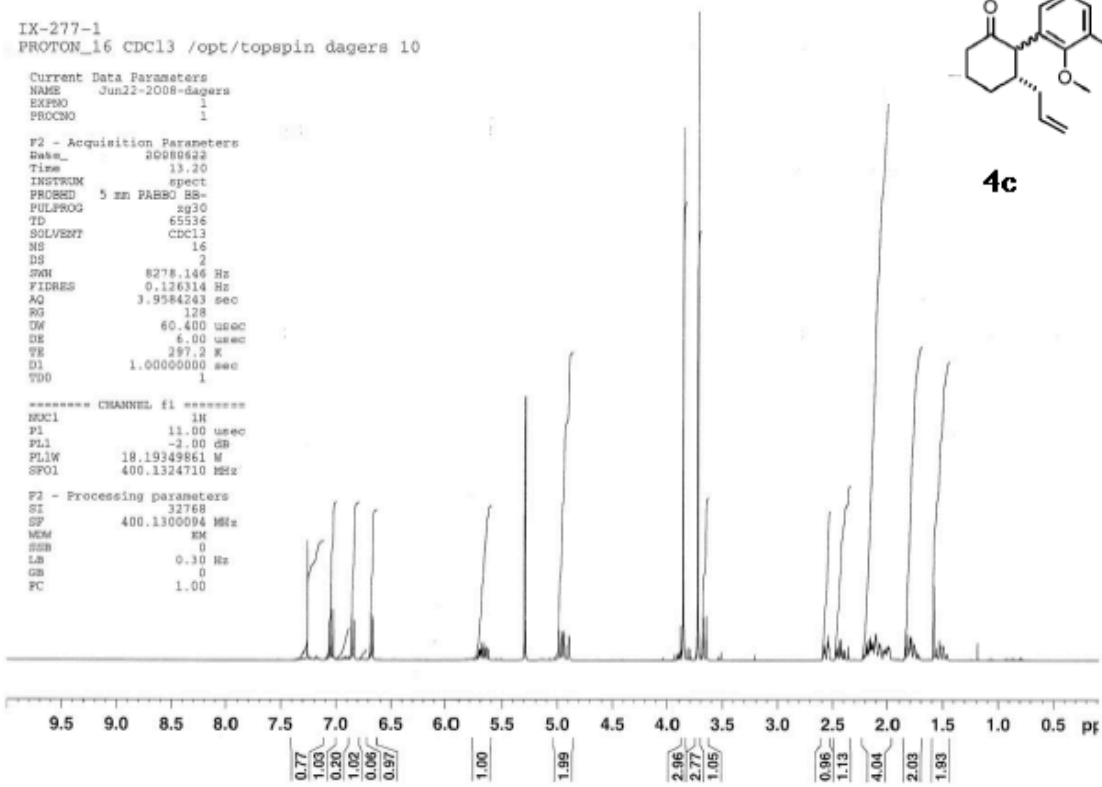

IX-277-1  
 C13APT256 CDC13 /opt/topspin dagers 10

Current Data Parameters  
 NAME Jun22-2008-dagers  
 EXPR0 1  
 PROCNO 1

F2 - Acquisition Parameters  
 Date\_ 20080622  
 Time 13:41  
 INSTRUM spect  
 PROBRD 5 mm PABBO BB-  
 PULPROG zgpg30  
 TD 65536  
 SOLVENT cdcl3  
 NS 32  
 DS 4  
 SWH 21880.814 Hz  
 FIDRES 0.365918 Hz  
 AQ 1.1664758 sec  
 RG 14384  
 DM 20.850 usec  
 DE 6.00 usec  
 TE 298.2 K  
 CHFT2 145.0003508  
 CHFT1 1.0000000  
 D1 3.80000000 sec  
 D2 0.00000000 sec  
 TDO 1

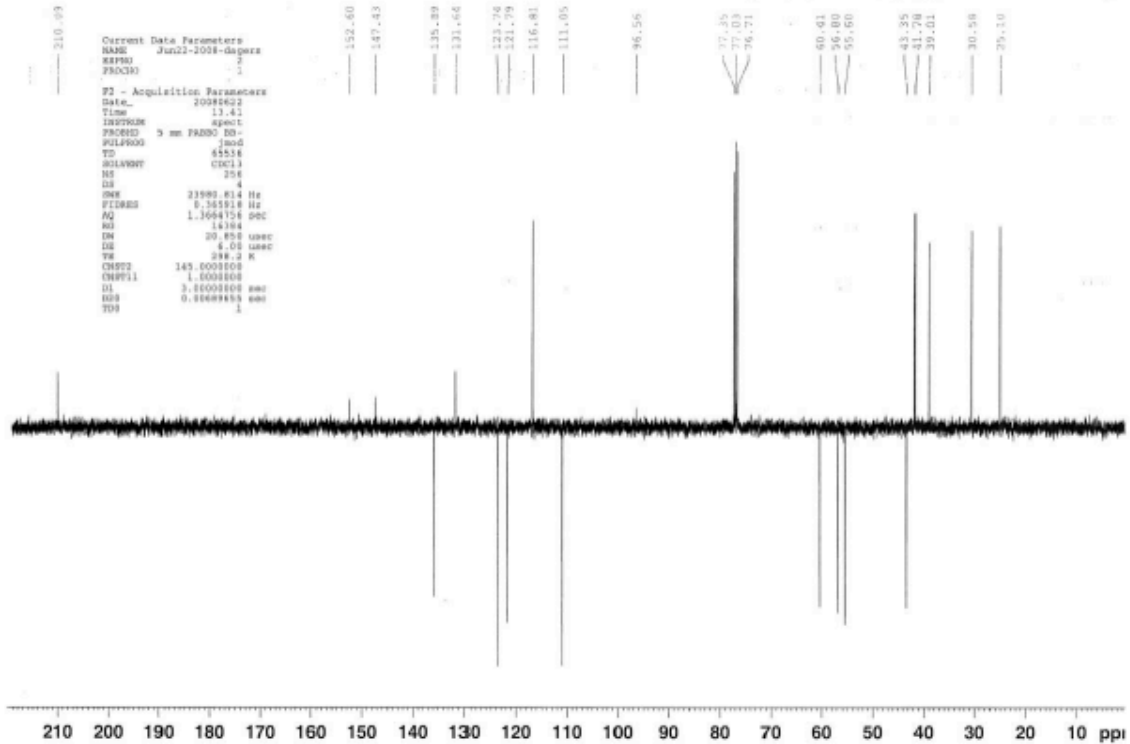

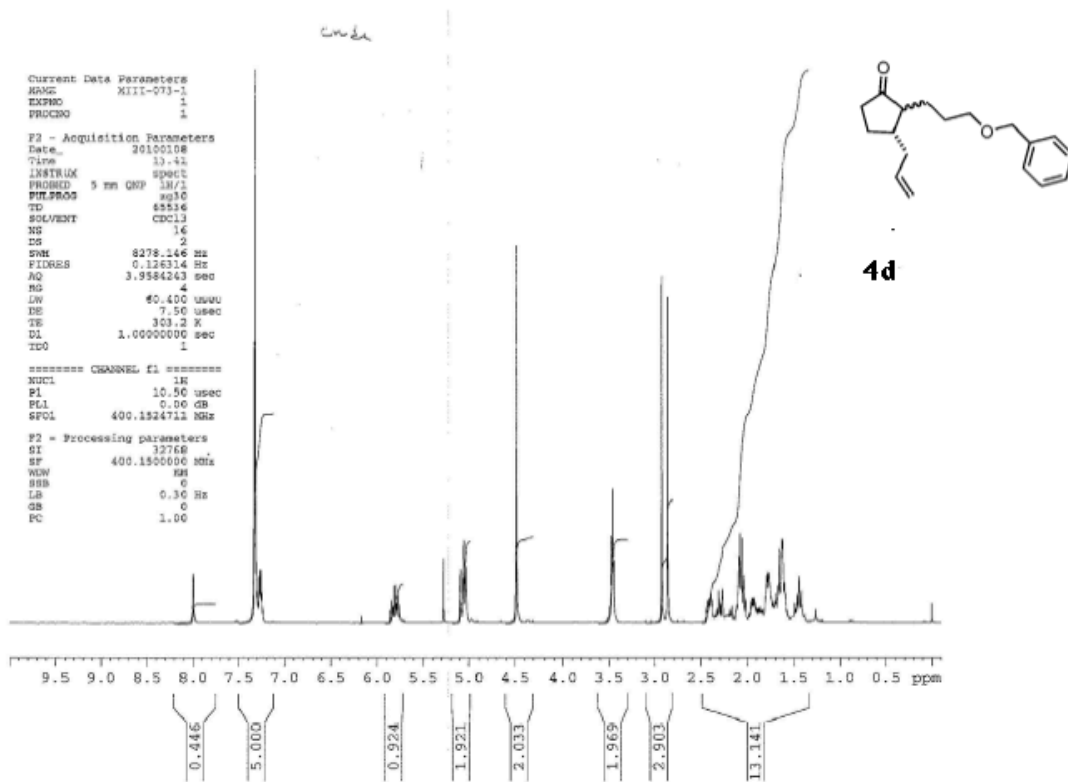

n

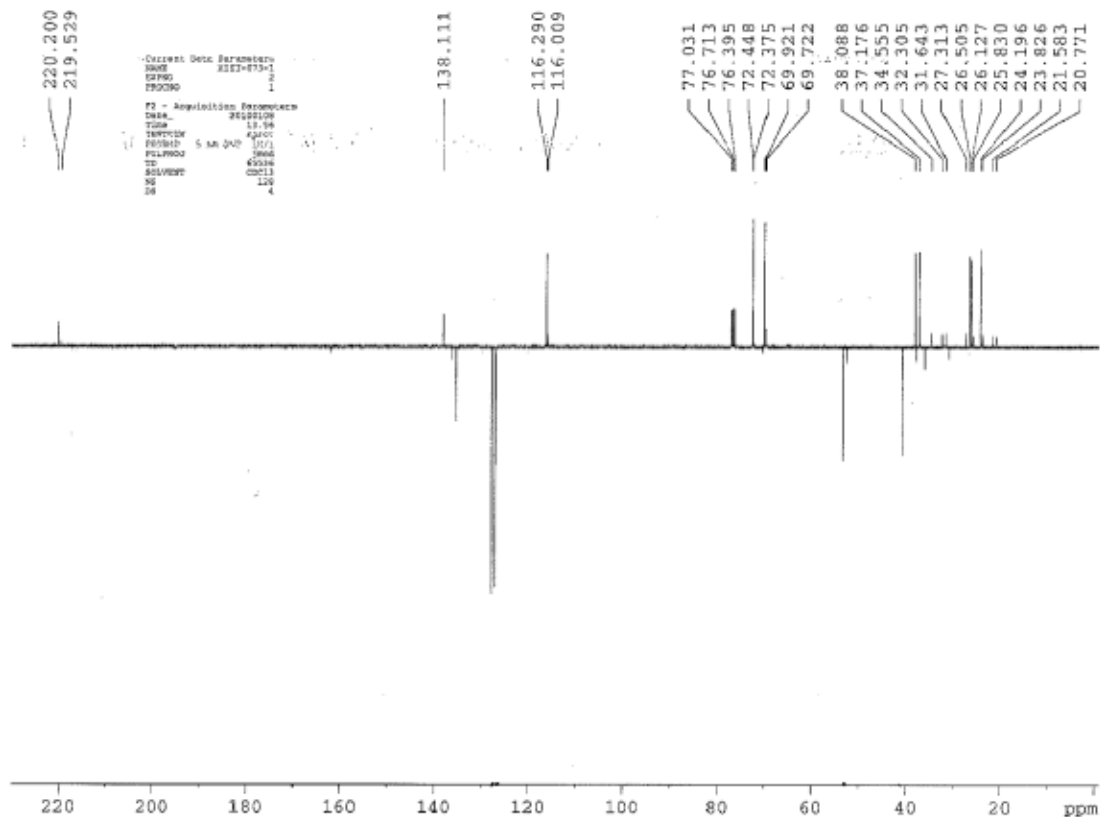

VIII-231-1  
 PROTON\_16 CDC13 /opt/topspin dagers 44

Current Data Parameters  
 NAME Jan23-2008-dagers  
 EXPNO 2  
 PROCNO 1

F2 - Acquisition Parameters  
 Date\_ 20080123  
 Time 23:59  
 INSTRUM spect  
 PULPROG 5 mm PABBO BBO-  
 TD 65536  
 SOLVENT CDC13  
 NS 16  
 DS 2  
 SFO 8278.146 Hz  
 FIDRES 0.126314 Hz  
 AQ 3.9584243 sec  
 RG 57  
 DW 60.400 usec  
 DE 4.00 usec  
 TE 299.2 K  
 D1 1.00000000 sec  
 D2 1

\*\*\*\*\* CHANNEL f1 \*\*\*\*\*  
 NUC1 1H  
 P1 11.00 usec  
 PC1 -2.00 dB  
 PL1W 18.19349861 W  
 SFO1 400.1324710 MHz

F2 - Processing parameters  
 SI 32768  
 SF 400.1300889 MHz  
 SCALING RM  
 SUB 0  
 LB 0.30 Hz  
 GB 0  
 PC 1.00

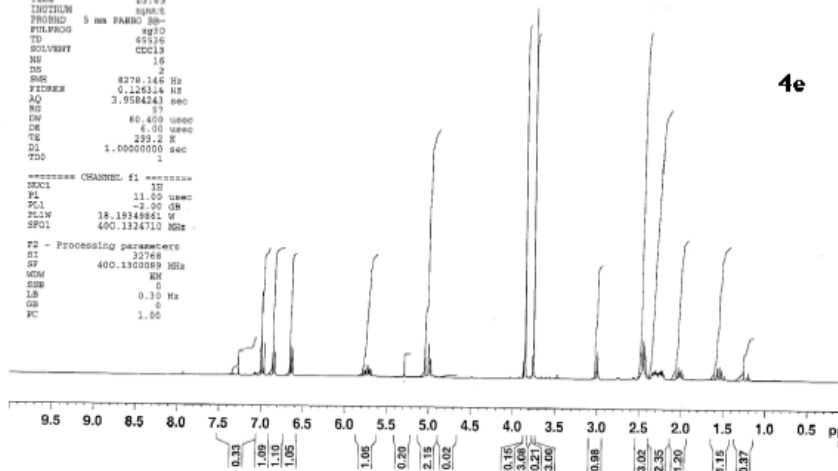

4e

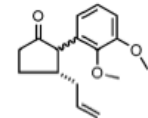

VIII-231-1  
 C13APT256 CDC13 /opt/topspin dagers 44

Current Data Parameters  
 NAME Jan23-2008-dagers  
 EXPNO 11  
 PROCNO 1

F2 - Acquisition Parameters  
 Date\_ 20080123  
 Time 23:30  
 INSTRUM spect  
 PULPROG 5 mm PABBO BBO-  
 TD 65536  
 SOLVENT CDC13  
 NS 354  
 DS 4

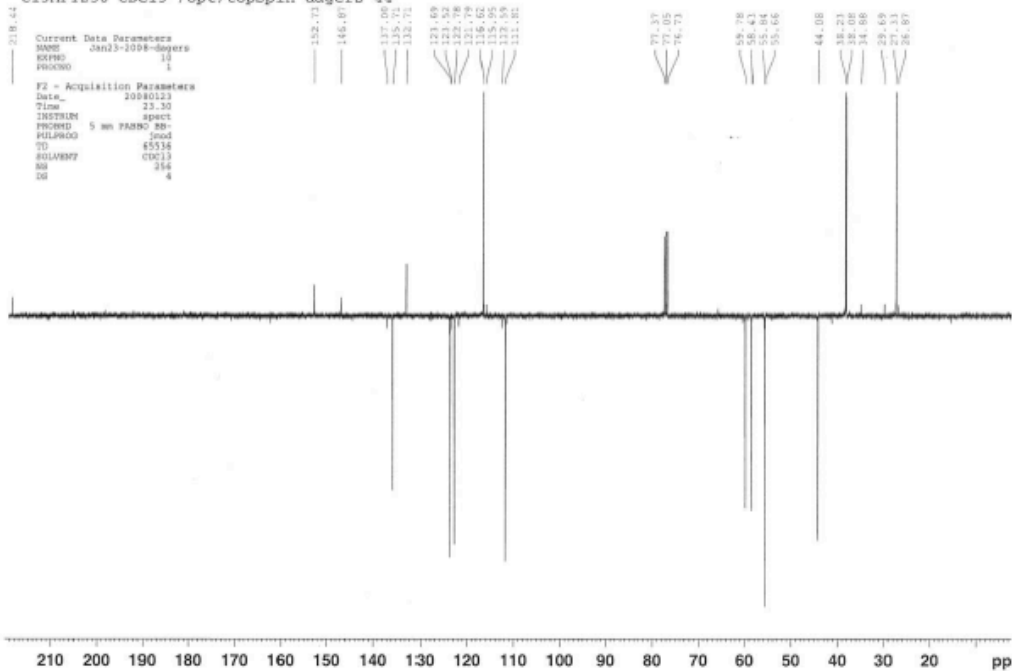

AMBAC7  
 PROTON\_16 CDC13 /opt/topspin2.1.6 dagers 30

Current Data Parameters  
 NAME Apr19-2010-dagers  
 EXPNO 1  
 PROCNO 1

F2 - Acquisition Parameters  
 Date\_ 20100420  
 Time 3.13  
 INSTRUM spect  
 PROBHD 5 mm CPQNP 1H/  
 PULPROG zg30  
 TD 65536  
 SOLVENT CDC13  
 NS 16  
 IS 2  
 SWH 8276.146 Hz  
 FIDRES 0.126314 Hz  
 AQ 3.9584243 sec  
 RG 4  
 DW 60.400 usec  
 DE 6.00 usec  
 TE 298.2 K  
 D1 1.00000000 sec  
 TEO 1

\*\*\*\*\* CHANNEL f1 \*\*\*\*\*  
 NUC1 1H  
 P1 13.50 usec  
 PL1 4.00 dB  
 PL1W 4.0700017 W  
 SFO1 400.1324710 MHz

F2 - Processing parameters  
 SI 32768  
 SF 400.1300000 MHz  
 MDW EM  
 SSB 0  
 LB 0.30 Hz  
 GB 0  
 PC 1.00

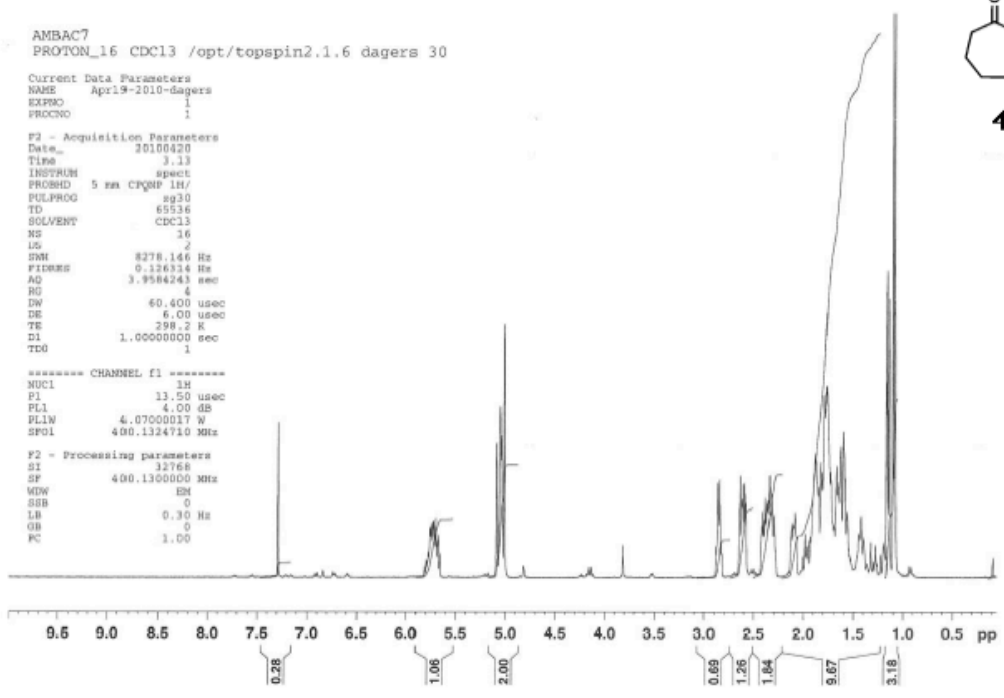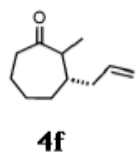

AMBAC7  
 C13APT256 CDC13 /opt/topspin2.1.6 dagers 30

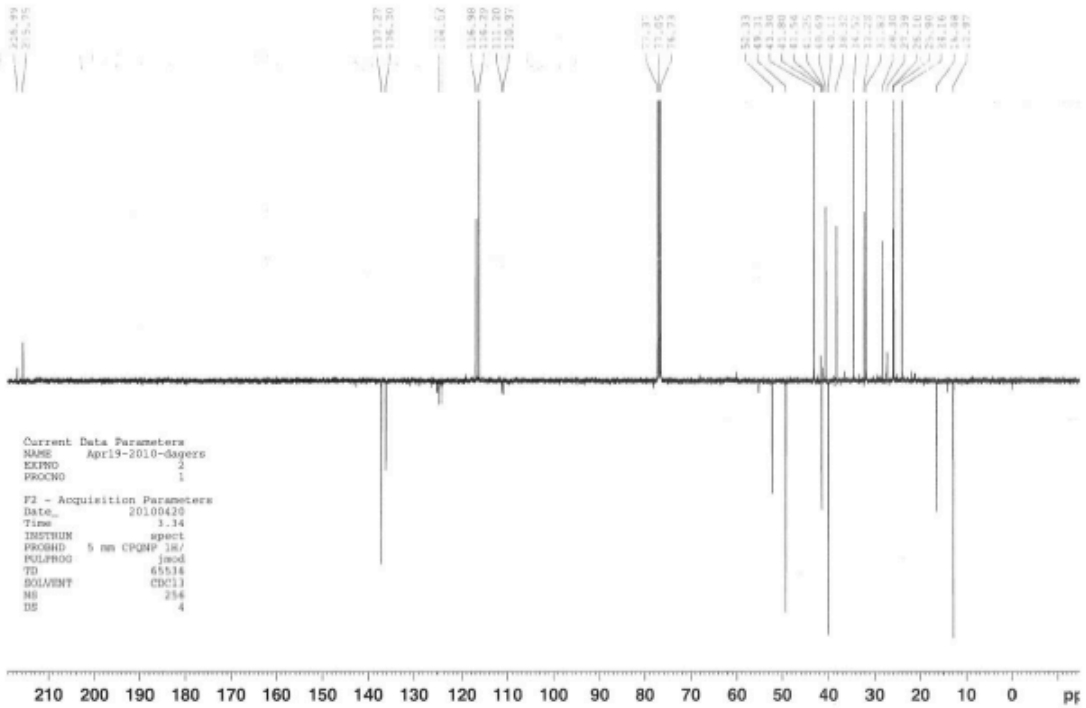

Current Data Parameters  
 NAME Apr19-2010-dagers  
 EXPNO 2  
 PROCNO 1

F2 - Acquisition Parameters  
 Date\_ 20100420  
 Time 1.14  
 INSTRUM spect  
 PROBHD 5 mm CPQNP 1H/  
 PULPROG jmod  
 TD 65536  
 SOLVENT CDC13  
 NS 256  
 DS 4
